# Supplementary material for: Solution processed double-decked V2Ox/PEDOT:PSS film serves as the hole transport layer of an inverted planar perovskite solar cell with high performance
Source: Royal Society of Chemistry journal article supplement (doi:10.1039/c7ra04414c), 2017-01-01
Supplement: c7ra04414c1.pdf [file c7ra04414c1.pdf]

### Electronic Supplementary Information

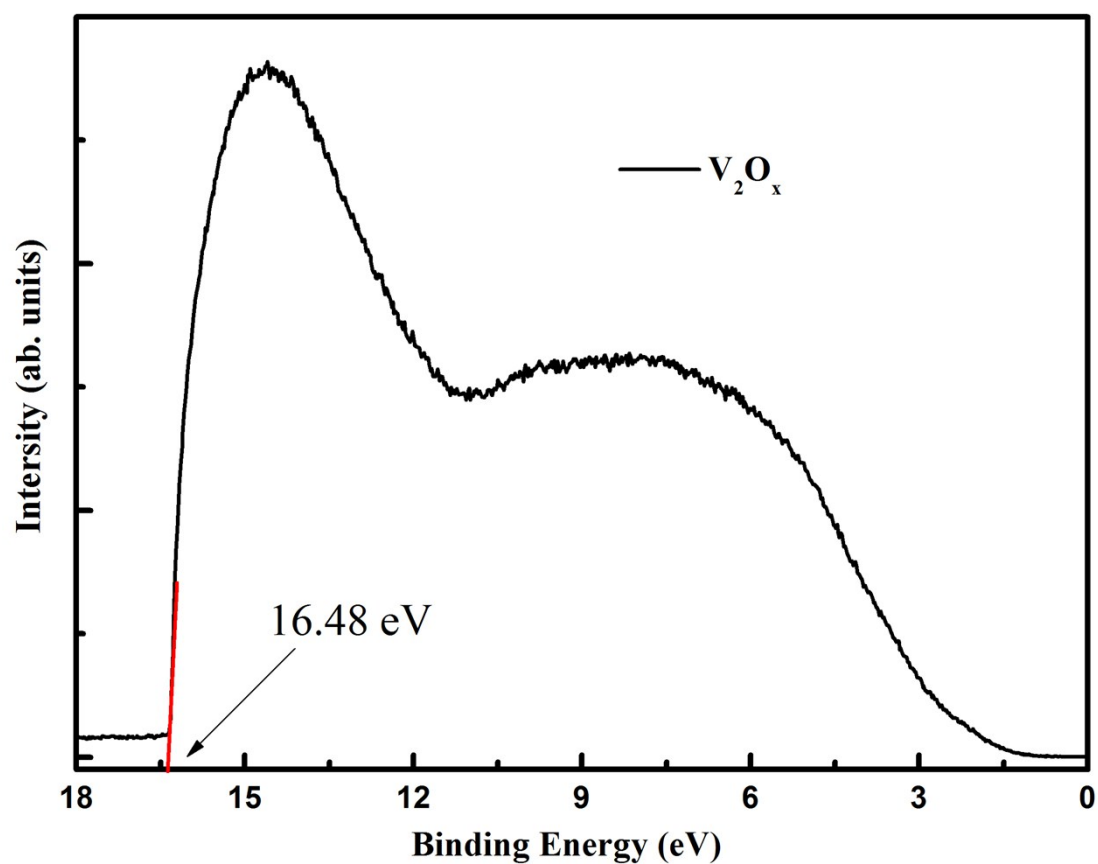

Fig. S1 The UPS spectra of  $V_2O_x$  film.

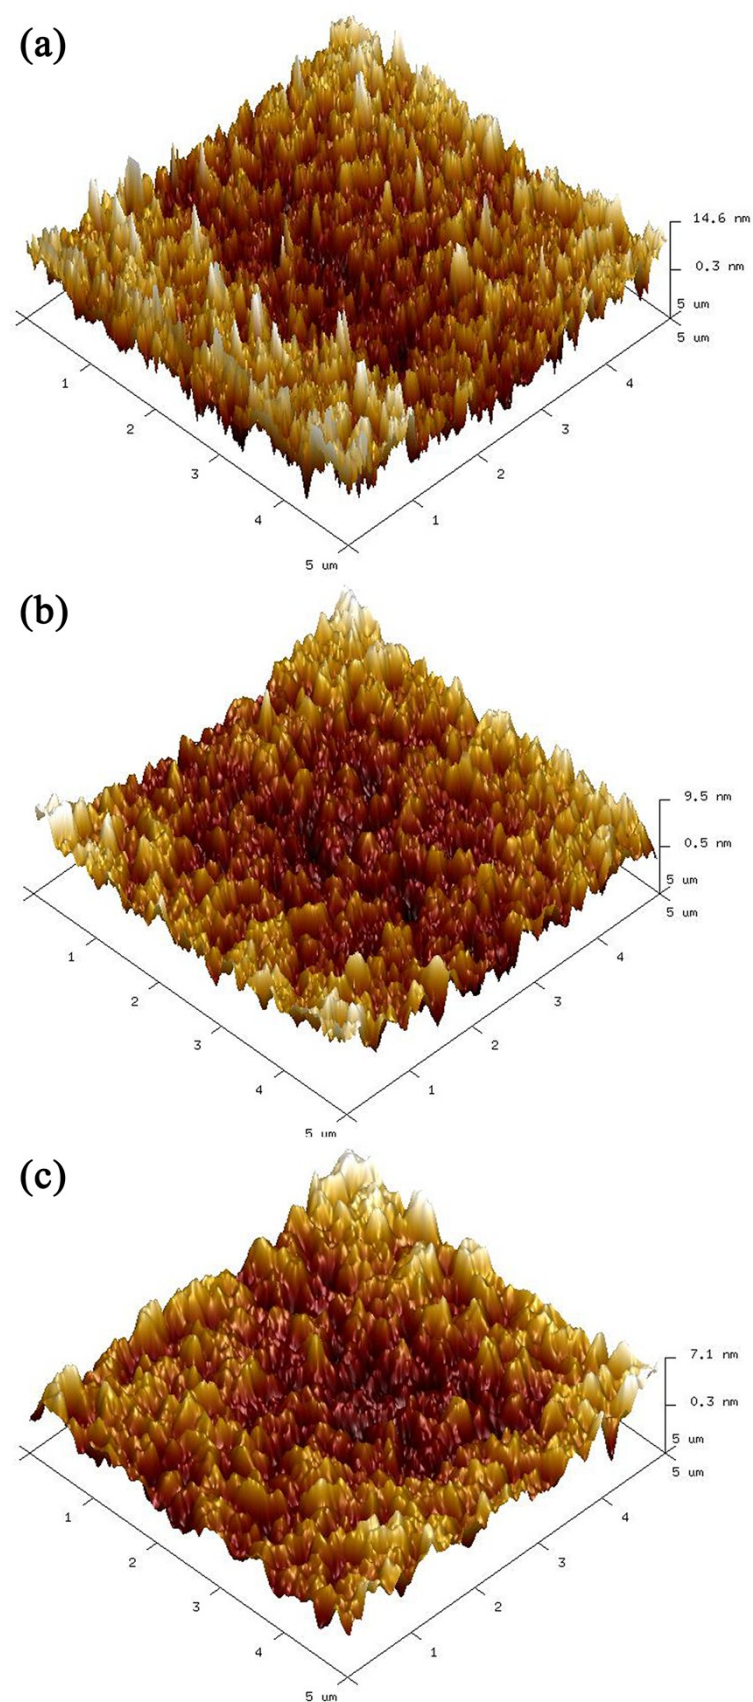

**Fig. S2** 3D AFM images of  $\text{V}_2\text{O}_x$  film (a), PEDOT:PSS film (b), and  $\text{V}_2\text{O}_x/\text{PEDOT:PSS}$  film (c) based on ITO coated glasses.
